# Supplementary material for: Green, fast, and large-scale synthesis of highly fluorescent Au nanoclusters for Cu2+ detection and temperature sensing
Source: Royal Society of Chemistry journal article supplement (doi:10.1039/c8an01617h), 2018-01-01
Supplement: c8an01617h1.pdf [file c8an01617h1.pdf]

## Supporting Information

### Green, fast, and large scale synthesis of highly fluorescent Au nanoclusters for detecting $\text{Cu}^{2+}$ and temperature sensing

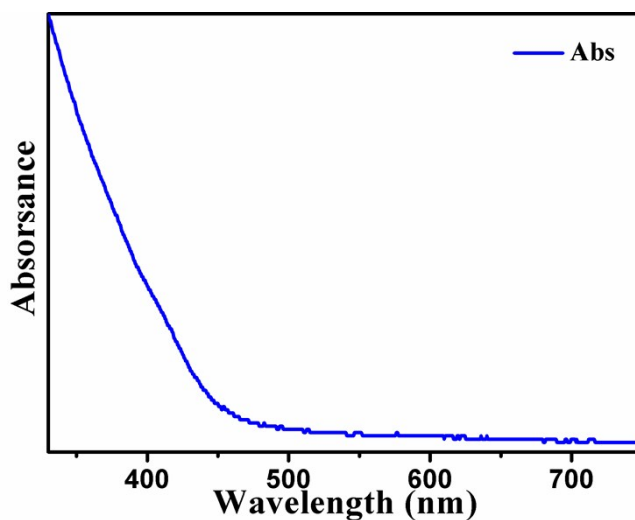

Figure S1. UV - Vis absorption spectra of Au NCs.

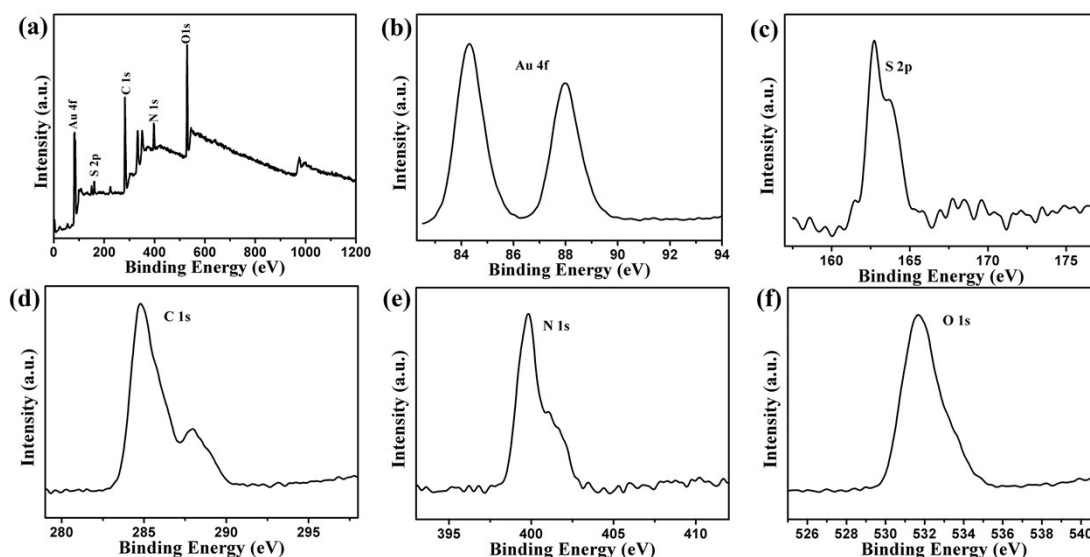

Figure S2. (a) the survey XPS spectrum of as-prepared GSH-Au NCs and XPS spectra of resultant fluorescent GSH-Au NCs: (b), Au 4f; (c), S 2p; (d), C 1s; (e), N 1s; (f), O 1s

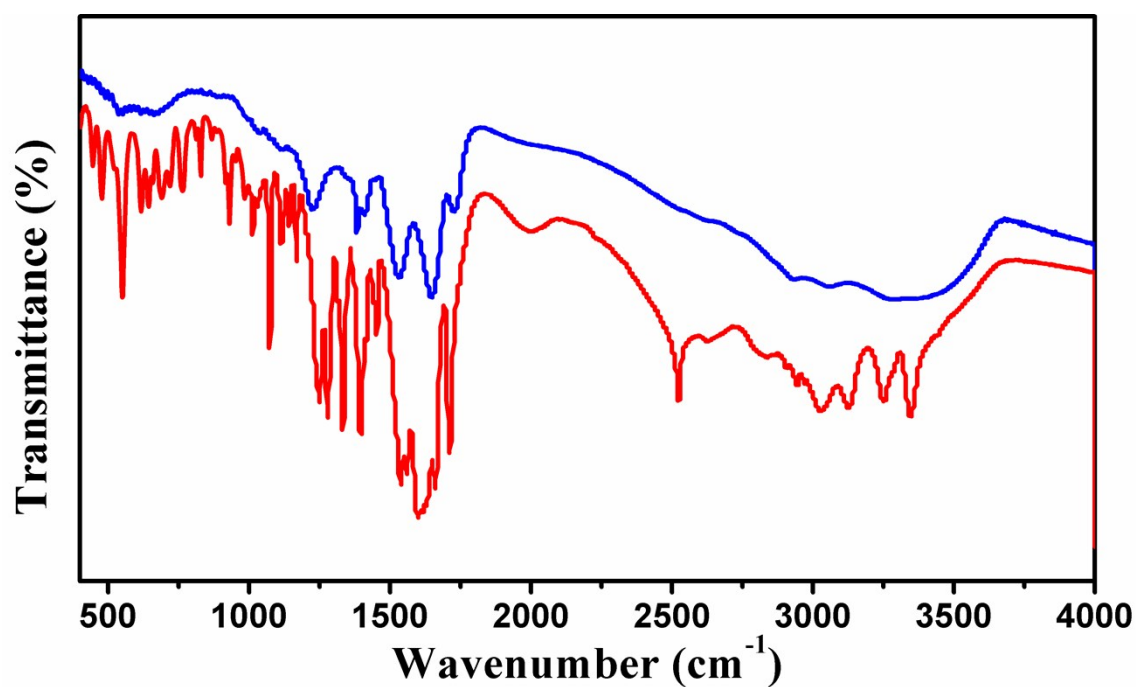

Figure S3. FT-IR spectra of GSH (red curve) and Au NCs (blue curve).

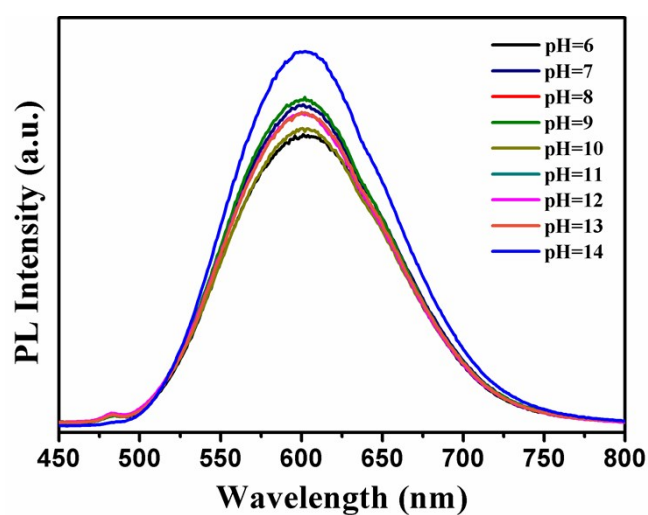

Figure S4. photoluminescence spectra of Au NCs at different pH.

**Table S1.** Determination of Cu<sup>2+</sup> ions in different water samples using a standard addition method (n= 3).

| <b>Samples</b> | <b>Cu<sup>2+</sup> spiked<br/>(ppb)</b> | <b>Cu<sup>2+</sup> found<br/>(ppb)</b> | <b>Recovery<br/>(%)</b> | <b>Relative standard<br/>deviation (%)</b> |
|----------------|-----------------------------------------|----------------------------------------|-------------------------|--------------------------------------------|
| Tap water      | 10.00                                   | 10.22                                  | 102.20                  | 1.16                                       |
|                | 20.00                                   | 19.95                                  | 99.75                   | 1.68                                       |
| Drinking water | 10.00                                   | 9.96                                   | 99.60                   | 0.97                                       |
|                | 20.00                                   | 19.86                                  | 99.30                   | 1.32                                       |
| Lake water     | 10.00                                   | 10.52                                  | 105.20                  | 1.66                                       |
|                | 20.00                                   | 20.48                                  | 102.40                  | 1.72                                       |

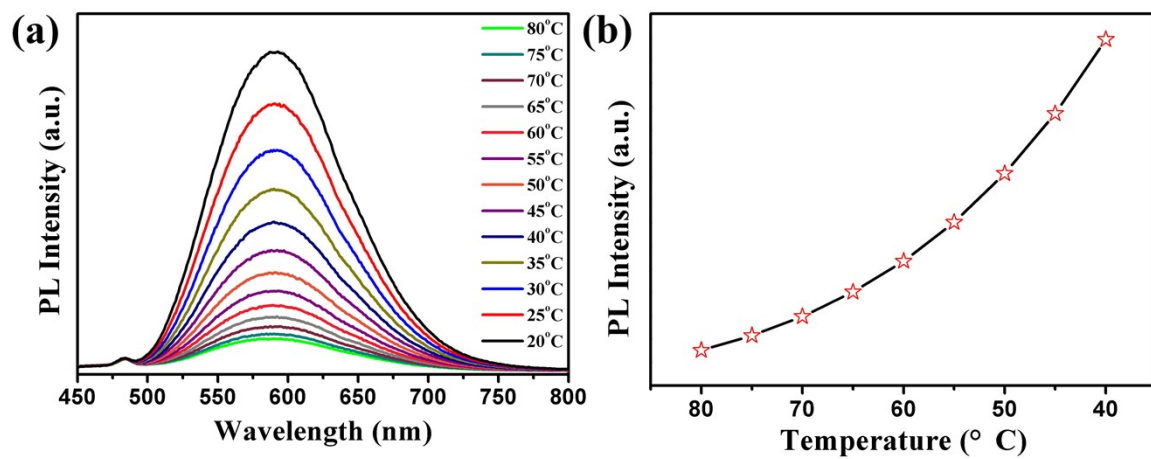

**Figure S5.** (a) Photoluminescence spectra of Au NCs with an decrease of temperature from 80 to 20 °C (top to bottom); (b) plot of photoluminescence intensity of resultant Au NCs at various temperature.
